# Supplementary material for: Intravenous Thrombolysis With Alteplase at 0.6 mg/kg in Patients With Ischemic Stroke Taking Direct Oral Anticoagulants
Source: PubMed Central journal article supplement — J Am Heart Assoc. 2022 Sep 21;11(19):e025809. doi: 10.1161/JAHA.122.025809 (PMC9673692; doi:10.1161/jaha.122.025809), 2022-09-21
Supplement: JAH3-11-e025809-s001.pdf [file JAH3-11-e025809-s001.pdf]

## **SUPPLEMENTAL MATERIAL**

### **Intravenous Thrombolysis With Alteplase at 0.6 mg/kg in Patients With Ischemic Stroke Taking Direct Oral Anticoagulants**

*Table S1. Regimens of direct oral anticoagulants before stroke onset (Page 2)*

*Table S2. Baseline characteristics of patients on DOACs who developed hemorrhagic events after administration of intravenous alteplase (Page 3)*

*Table S3. Reasons for non-administration of alteplase for patients on DOACs (Page 5)*

*Figure S1. Flow chart of patient selection in the present study (Page 6)*

**Table S1. Regimens of direct oral anticoagulants before stroke onset**

| Oral anticoagulants   | n |
|-----------------------|---|
| Dabigatran 150 mg BID | 3 |
| Dabigatran 110 mg BID | 3 |
| Rivaroxaban 10 mg QD  | 8 |
| Apixaban 10 mg BID    | 9 |
| Apixaban 5 mg BID     | 7 |
| Edoxaban 60 mg QD     | 1 |
| Edoxaban 30 mg QD     | 7 |
| Edoxaban 15 mg QD     | 2 |

Data are presented as number of patients. BID, bis in die (twice a day); QD, quaque die (once a day).

**Table S2. Baseline characteristics of patients on DOACs who developed hemorrhagic events after administration of intravenous alteplase**

| Cases                                       | DOACs       | Dose (mg/day) | Duration from last intake to stroke IVT (hours) | Age (years) | Sex | BW (kg) | CCr (mL/min) | PT-INR | APTT (seconds) | Baseline NIHSS score | LVO    | EVT | Combination of antiplatelet agents | Hemorrhagic events               | mRS at 3 months |
|---------------------------------------------|-------------|---------------|-------------------------------------------------|-------------|-----|---------|--------------|--------|----------------|----------------------|--------|-----|------------------------------------|----------------------------------|-----------------|
| Any ICH                                     |             |               |                                                 |             |     |         |              |        |                |                      |        |     |                                    |                                  |                 |
| Symptomatic ICH                             |             |               |                                                 |             |     |         |              |        |                |                      |        |     |                                    |                                  |                 |
| 1                                           | Rivaroxaban | 10            | About 8                                         | 88          | M   | 55      | 31.0         | 1.20   | 29             | 32                   | ICA    | -   | -                                  | PH 2                             | 6               |
| Other ICH                                   |             |               |                                                 |             |     |         |              |        |                |                      |        |     |                                    |                                  |                 |
| 2                                           | Apixaban    | 5             | 12–24                                           | 87          | M   | 57      | 28.9         | 1.19   | 32             | 28                   | MCA M1 | -   | -                                  | HI 1                             | 5               |
| 3                                           | Edoxaban    | 30            | 12–24                                           | 91          | F   | 44      | 22.7         | 1.12   | 30             | 17                   | MCA M2 | +   | Clopidogrel                        | HI 1                             | 4               |
| 4                                           | Rivaroxaban | 10            | 12–24                                           | 87          | M   | 61      | 38.1         | 1.19   | 31             | 5                    | MCA M1 | +   | -                                  | HI 1, SAH                        | 0               |
| 5                                           | Rivaroxaban | 10            | 12–24                                           | 75          | M   | 60      | 52.6         | 1.03   | 29             | 28                   | MCA M2 | +   | -                                  | HI 2, SAH                        | 4               |
| Hemorrhagic events fulfilling ISTH criteria |             |               |                                                 |             |     |         |              |        |                |                      |        |     |                                    |                                  |                 |
| 6                                           | Rivaroxaban | 10            | 12–24                                           | 83          | M   | 68      | 79.2         | 1.45   | 23             | 14                   | MCA M1 | +   | -                                  | Bleeding at vascular access site | 3               |

APTT, activated partial thromboplastin time; BW, body weight; CCr, creatinine clearance (calculated by Cockcroft–Gault equation); DOAC, direct oral anticoagulant; EVT, endovascular therapy; F, female; HI, hemorrhagic infarction; ICA, internal carotid artery; ICH, intracranial hemorrhage; ISTH, International Society on Thrombosis and Haemostasis; IVT, intravenous thrombolysis; LVO, large vessel occlusion; mRS,

modified Rankin Scale; M, male; MCA, middle cerebral artery; NIHSS, National Institutes of Health Stroke Scale; PH, parenchymal hematoma; PT-INR, prothrombin time–international normalized ratio; SAH, subarachnoid hemorrhage.

**Table S3. Reasons for non-administration of alteplase for patients on DOACs**

| <b>Reasons</b>                                                          | <b>n</b> |
|-------------------------------------------------------------------------|----------|
| <b>Total</b>                                                            | 302      |
| Outside the time window for IVT*                                        | 204      |
| Reason other than outside of the time window <sup>†</sup>               | 98       |
| Mild neurological symptom or rapid symptom improvement                  | 58       |
| Extensive infarct on baseline imaging                                   | 17       |
| PT-INR of >1.7 or APTT of >40 seconds                                   | 9        |
| Previous intracranial hemorrhage                                        | 8        |
| Recent ischemic stroke                                                  | 8        |
| Onset immediately after DOAC intake                                     | 4        |
| Consent not obtained for religious reasons                              | 2        |
| Suspicious of other disease on admission                                | 2        |
| Recent surgery                                                          | 1        |
| History of gastrointestinal bleeding (remote) or genitourinary bleeding | 1        |
| Severe liver damage                                                     | 1        |

APTT, activated partial thromboplastin time; DOAC, direct oral anticoagulant; IVT, intravenous thrombolysis; PT-INR, prothrombin time–international normalized ratio.

\* “Outside the time window for IVT” indicated patients who arrived at our hospital more than 4.5 hours from stroke onset or the last known well time.

<sup>†</sup>Multiple reasons per patient allowed.

**Figure S1. Flow chart of patient selection in the present study**

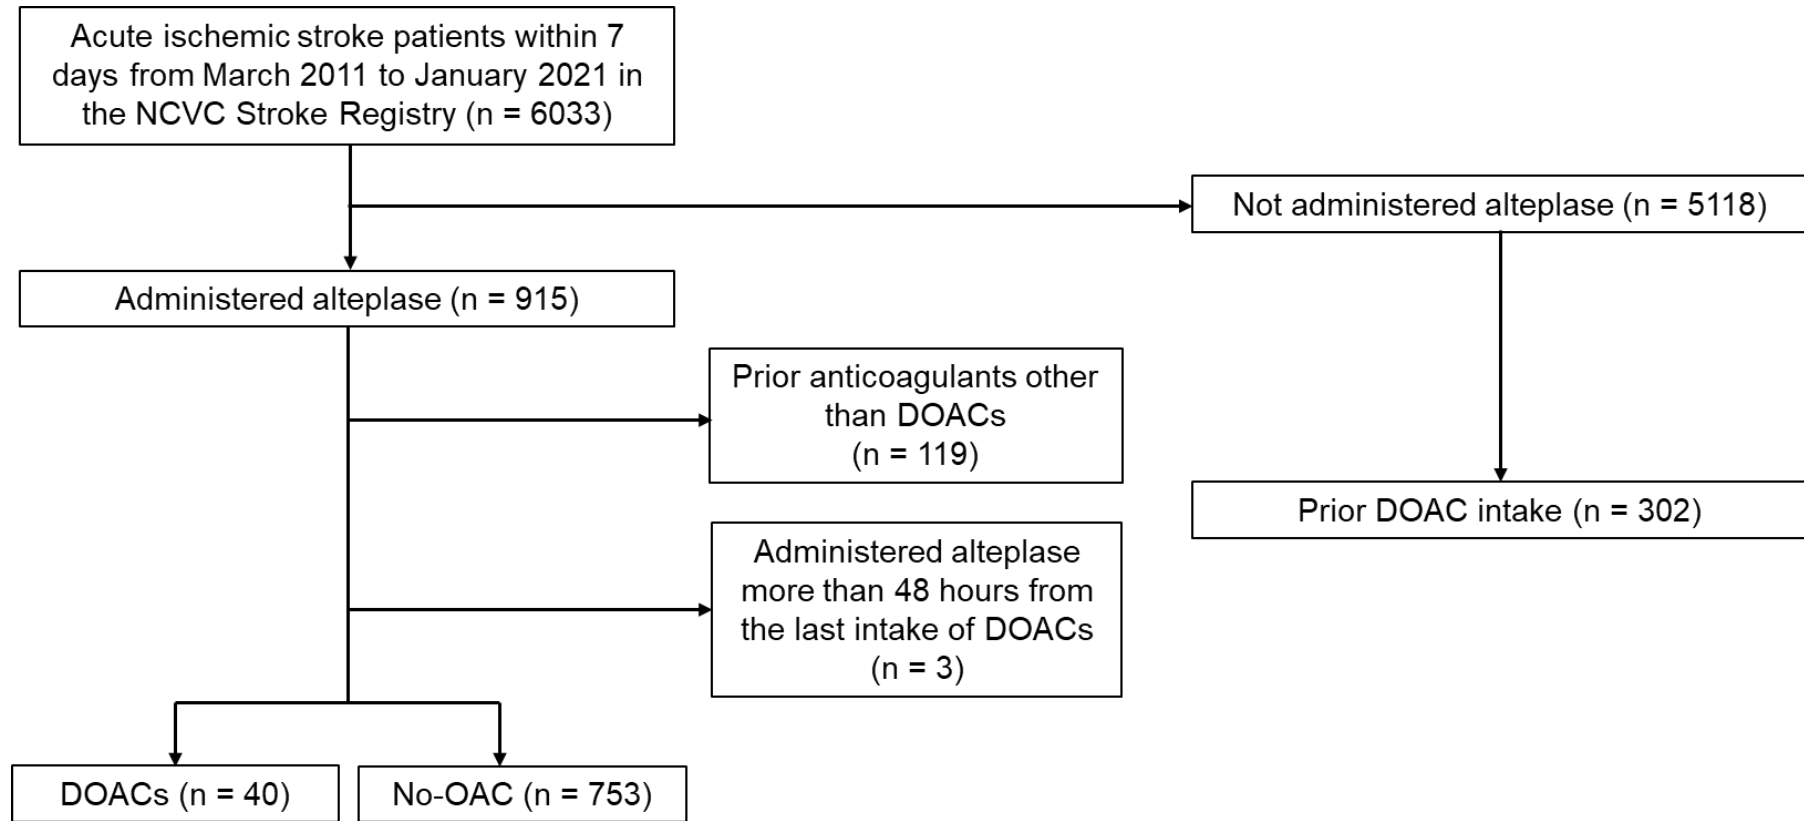

DOAC, direct oral anticoagulant; IVT, intravenous thrombolysis; OAC, oral anticoagulant; NCVS, National Cerebral and Cardiovascular Center; VKA, vitamin K antagonist
